# Supplementary material for: Single fecal microbiota transplantation failed to change intestinal microbiota and had limited effectiveness against ulcerative colitis in Japanese patients
Source: PubMed Central journal article supplement — Intest Res. 2017 Jan 31;15(1):68–74. doi: 10.5217/ir.2017.15.1.68 (PMC5323309; doi:10.5217/ir.2017.15.1.68), 2017-01-31
Supplement: ir-15-68-s002.pdf [file ir-15-68-s002.pdf]

See "Single fecal microbiota transplantation failed to change intestinal microbiota and had limited effectiveness against ulcerative colitis in Japanese patients" on page 68.

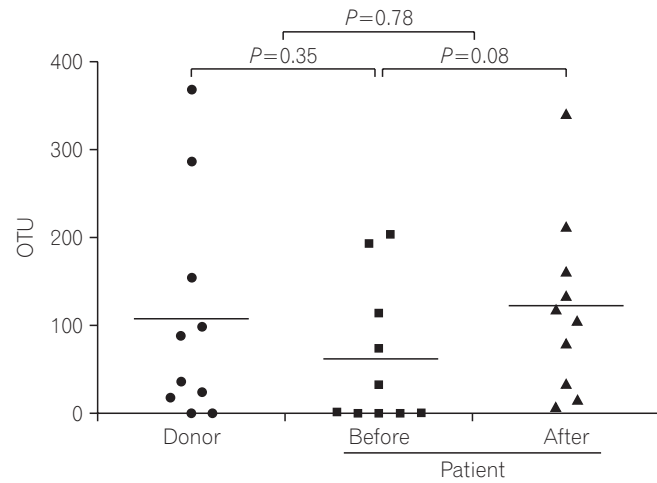

**Supplementary Fig. 2.** Abundance of *Bifidobacterium longum* in donors and patients pre- and 12 weeks post-fecal microbiota transplantation. OTU, operational taxonomic unit.
